# Supplementary material
Source: Springer Nature journal article supplement (https://www.springermedizin.de/resource/supplementary/12879_2013_3005_MOESM2_ESM.pdf/9446826)
Supplement: MOESM2 [file 9446826]

1575 households were included in the study  
(Total 3381 contacts)

254 contacts with symptoms

46 (18%) of 254 cases were confirmed

12 (26%) of 46 positive cases

3101 contacts without symptoms  
*26 contacts declined to test*

46 (1%) of 3101 cases were confirmed

9 (20%) of 46 positive cases
